# Supplementary material
Source: publisher figshare collection journal article supplement (https://acs.figshare.com/ndownloader/files/9779638)
Supplement: Supplementary file 1 [file 9779638]

#\#CIF_1.1
 
#  CIF produced by WinGX routine CIF_UPDATE
#  Created on 2016-10-07 at 15:34:51
#  Using CIFtbx version 3.0.4  1 Sep 2006
 
#  Dictionary name : cif_core.dic
#  Dictionary vers : 2.4.3
#  Request file    : c:\wingx\files\archive.reqdat
#  CIF files read  : 5bromo project
 
#------------------ SECTION 1. GLOBAL INFORMATION ---------------------------#
 
data_global
 
#------------------ AUDIT DETAILS -------------------------------------------#
 
_audit_creation_date            2016-10-07
_audit_creation_method          'WinGX routine CIF_UPDATE'
_audit_conform_dict_name        cif_core.dic
_audit_conform_dict_version     2.4.3
_audit_conform_dict_location    ftp://ftp.iucr.org/pub/cif_core.dic
_audit_update_record            ?
 
#------------------ AUTHOR DETAILS -------------------------------------------#
 
# Name and address of author for correspondence
 
_publ_contact_author_name       'Anbarasan, Pazhamalai'
_publ_contact_author_address
;
Department of Chemistry
Indian Institute of Technology Madras
Chennai - 600036
;
_publ_contact_author_email       'anbarasansp@iitm.ac.in'
_publ_contact_author_fax         '+91-44-22574202'
_publ_contact_author_phone       '+91-44-22574216'
 
 
# Insert blank lines between references
 
_publ_section_references
;
Blessing, R. H. (1995) Acta Cryst., A51, 33-38.
 
Blessing, R. H. (1987) Cryst. Rev. 1, 3-58.
 
Blessing, R. H. (1989) J. Appl. Cryst. 22, 396-397.
 
Bruker (2012) APEX2 (Version 2012.10-0), SAINT (version 8.27B), SADABS
(version 2012/1), BrukerAXS Inc, Madison, Wisconsin, USA.
 
ABSCOR: Higashi, T. (1995). ABSCOR. Rigaku Corporation, Tokyo, Japan.
 
CAD-4 Software: Enraf-Nonius (1989). CAD-4 Software (or CAD-4 EXPRESS).
Enraf-Nonius, Delft, The Netherlands.
 
Cambridge Structural Database: Allen, F. R. (2002). Acta Cryst. B58, 380-388.
 
CAMERON: Watkin, D. J., Prout, C. K. & Pearce, L. J. (1996). CAMERON.
Chemical Crystallography Laboratory, Oxford, England.
 
CrysAlis CCD, CrysAlis RED and associated programs: Oxford Diffraction (2006).
Program name(s). Oxford Diffraction Ltd, Abingdon, England.
 
CRYSTALS: Betteridge, P. W., Carruthers, J. R., Cooper, R. I., Prout, K. &
Watkin, D. J. (2003). J. Appl. Cryst. 36, 1487.
 
COLLECT: Nonius (1998). COLLECT. Nonius BV, Delft, The Netherlands.
 
DENZO/SCALEPACK:  Otwinowski, Z. & Minor, W. (1997). Methods in Enzymology,
Vol. 276, Macromolecular Crystallography, Part A, edited by C. W. Carter Jr
& R. M. Sweet, pp. 307-326. New York: Academic Press.
 
DIAMOND: Brandenburg, K.(2006). DIAMOND. Crystal Impact GbR, Bonn, Germany.
 
DIF4 and REDU4: Stoe & Cie (1991). Program name(s). Stoe & Cie, Darmstadt,
Germany.
 
DIFABS: Walker, N. &  Stuart, D. (1983). Acta Cryst., A39, 158 - 166.
 
DIRAX: Duisenberg, A. J. M. (1992). J. Appl. Cryst. 25, 92-96.
 
DIRDIF-2008: Beurskens, P.T., Beurskens, G., de Gelder, R., Garci\'ia-Granda,
S., Gould, R.O. & Smits, J.M.M. (2008) The DIRDIF-2008 program
system, Crystallography Laboratory, Radboud University  Nijmegen,
The Netherlands.
 
EDMA: Palatinus, L., Prathapa, S. J. & van Smaalen, S. (2012) J. Appl. Cryst.
45, 575-580.
 
enCIFer: Allen, F. H., Johnson, O., Shields, G. P., Smith, B. R. & Towler,
M. (2004). J. Appl. Cryst. 37, 335-338.
 
EVALCCD: Duisenberg, A. J. M., Kroon-Batenburg, L. M. J. & Schreurs,
A. M. M. (2003). J. Appl. Cryst. 36, 220-229.
 
JANA2000: Petricek, V. & Dusek, M. (2000). JANA2000. Institute of Physics,
Czech Academy of Sciences, Prague, Czech Republic.
 
MERCURY: Macrae, C. F., Bruno, I. J., Chisholm, J. A., Edgington,
P. R., McCabe, P., Pidcock, E., Rodriguez-Monge, L., Taylor, R.,
van de Streek, J. & Wood, P. A. (2008). J. Appl. Cryst. 41, 466-470.
 
MOGUL: Bruno, I. J., Cole, J. C., Kessler, M., Luo, J., Motherwell,
W. D. S., Purkis, L. H., Smith, B. R., Taylor, R., Cooper, R. I., Harris,
S. E. & Orpen, A. G. (2004). J. Chem. Inf. Comput. Sci. 44, 2133-2144.
 
ORTEPII: Johnson, C. K. (1976). ORTEPII. Report ORNL-5138. Oak Ridge
National Laboratory, Tennessee, USA.
 
ORTEPIII:  Burnett, M. N. & Johnson, C. K. (1996). ORTEPIII.
Report ORNL-6895. Oak Ridge National Laboratory, Tennessee, USA.
 
ORTEP-3: Farrugia, L. J. (2012). J. Appl. Cryst. 45, 849-854.
 
PARST: Nardelli, M. (1995). J. Appl. Cryst. 28, 659.
 
PLATON: Spek, A. L. (2009). Acta. Cryst. D65, 148-155.
 
PROCESS: Rigaku (1996). PROCESS. Rigaku Corporation, Tokyo, Japan.
 
PROCESS-AUTO: Rigaku (1998). PROCESS-AUTO. Rigaku Corporation, Tokyo, Japan.
 
PublCIF: Westrip, S. P. (2010). J. Appl. Cryst. 43, 920-925.
 
SCHAKAL: Keller, E. (1999) University of Freiburg, Germany.
 
SHELX: Sheldrick, G. M. (2008). Acta Cryst. A64, 112-122.
 
SHELXD: Schneider, T. R. & Sheldrick, G. M. (2002) Acta Cryst. D58, 1772-1779.
 
SIR92: Altomare, A., Cascarano, G., Giacovazzo, C., Guagliardi, A., Burla,
M. C., Polidori, G. & Camalli, M. (1994). J. Appl. Cryst. 27, 435.
 
SIR97: Altomare, A., Burla, M. C., Camalli, M., Cascarano, G. L.,
Giacovazzo, C., Guagliardi, A., Moliterni, A. G. G., Polidori, G. &
Spagna, R. (1999). J. Appl. Cryst. 32, 115-119.
 
SIR2002: Burla, M. C., Camalli, M., Carrozzini, B., Cascarano, G. L.,
Giacovazzo, C., Polidori, G. & Spagna, R. (2003). J. Appl. Cryst. 36, 1103.
 
SIR2004: Burla, M. C., Caliandro, R., Camalli, M., Carrozzini, B.,
Cascarano, G. L., De Caro, L., Giacovazzo, C., Polidori, G. & Spagna, R.
(2005). J. Appl. Cryst. 38, 381-388.
 
SIR2008 & IL MILIONE: Burla, M. C., Caliandro, R., Camalli, M., Carrozzini, B.,
Cascarano, G. L., De Caro, L., Giacovazzo, C., Polidori, G., Siliqi, D.,
& Spagna, R. (2007). J. Appl. Cryst. 40, 609-613.
 
SIR2011: Burla, M. C., Caliandro, R., Camalli, M., Carrozzini, B.,
Cascarano, G. L., Giacovazzo, C., Mallamo, M., Mazzone, A., Polidori, G.
& Spagna, R. (2012). J. Appl. Cryst. 45, 357-361.
 
SUPERFLIP: Palatinus, L. & Chapuis, G. (2007) J. Appl. Cryst. 40, 786-790.
 
TEXSAN: Molecular Structure Corporation & Rigaku (2000). TEXSAN. MSC,
The Woodlands, Texas, USA, and Rigaku Corporation, Tokyo, Japan.
 
WinGX: Farrugia, L. J. (2012). J. Appl. Cryst. 45, 849-854.
 
X-AREA, X-RED, X-RED32, X-SHAPE:  Stoe & Cie (2002). Program name(s).
Stoe & Cie GmbH, Darmstadt, Germany.
 
XCAD4: Harms, K. & Wocadlo, S. (1995). XCAD4. University of Marburg, Germany.
 
XSCANS: Siemens (1994). XSCANS. Siemens Analytical X-ray Instruments Inc.,
Madison, Wisconsin, USA.
 
;
 
#------------------  SECTION 2. COMPOUND(S) DETAILS -------------------------#
 
data_shelx
 
_audit_creation_date                    2016-10-07T15:34:51-00:00
_audit_creation_method                  'WinGX routine CIF_UPDATE'
_audit_conform_dict_name                cif_core.dic
_audit_conform_dict_version             2.4.3
_audit_conform_dict_location            ftp://ftp.iucr.org/pub/cif_core.dic
_publ_requested_category                FO
 
#----------------------------------------------------------------------------#
#                   CHEMICAL INFORMATION                                     #
#----------------------------------------------------------------------------#
 
_chemical_formula_moiety                'C28  H25  F3  N2  O2'
_chemical_formula_sum                   'C28 H25 F3 N2 O2'
_chemical_formula_weight                478.5
 
#----------------------------------------------------------------------------#
#                   UNIT CELL INFORMATION                                    #
#----------------------------------------------------------------------------#
 
_symmetry_cell_setting                  triclinic
_symmetry_space_group_name_H-M          'P -1'
_symmetry_space_group_name_Hall         '-P 1'
_symmetry_Int_Tables_number             2
loop_
    _symmetry_equiv_pos_as_xyz
'x, y, z'
'-x, -y, -z'
 
_cell_length_a                          10.0940(3)
_cell_length_b                          10.1679(3)
_cell_length_c                          12.6813(3)
_cell_angle_alpha                       81.8483(13)
_cell_angle_beta                        72.4104(12)
_cell_angle_gamma                       71.5178(11)
_cell_volume                            1175.17(6)
_cell_formula_units_Z                   2
_cell_measurement_temperature           296(2)
_cell_measurement_reflns_used           5359
_cell_measurement_theta_min             2.21
_cell_measurement_theta_max             24.37
_cell_measurement_wavelength            0.71073
 
#----------------------------------------------------------------------------#
#                   CRYSTAL INFORMATION                                      #
#----------------------------------------------------------------------------#
 
_exptl_crystal_description              Block
_exptl_crystal_colour                   Brown
_exptl_crystal_size_max                 0.3
_exptl_crystal_size_mid                 0.25
_exptl_crystal_size_min                 0.25
_exptl_crystal_density_diffrn           1.352
_exptl_crystal_density_method           'not measured'
_exptl_crystal_F_000                    500
 
#----------------------------------------------------------------------------#
#                   ABSORPTION CORRECTION                                    #
#----------------------------------------------------------------------------#
 
_exptl_absorpt_coefficient_mu           0.101
_exptl_absorpt_correction_type          none
_shelx_estimated_absorpt_T_min          0.97
_shelx_estimated_absorpt_T_max          0.975
 
#----------------------------------------------------------------------------#
#                   DATA COLLECTION                                          #
#----------------------------------------------------------------------------#
 
_diffrn_ambient_temperature             296(2)
_diffrn_radiation_wavelength            0.71073
_diffrn_radiation_type                  MoK\a
_diffrn_radiation_probe                 x-ray
_diffrn_measurement_device_type         'Bruker APEX-II CCD'
_diffrn_measurement_method              '\f and \w scans'
_diffrn_standards_number                0
_diffrn_standards_interval_time         .
_diffrn_standards_interval_count        .
_diffrn_standards_decay_%               ?
_diffrn_reflns_av_R_equivalents         0.0212
_diffrn_reflns_av_unetI/netI            0.0233
_diffrn_reflns_number                   16842
_diffrn_reflns_limit_h_min              -11
_diffrn_reflns_limit_h_max              11
_diffrn_reflns_limit_k_min              -12
_diffrn_reflns_limit_k_max              12
_diffrn_reflns_limit_l_min              -15
_diffrn_reflns_limit_l_max              14
_diffrn_reflns_theta_min                1.687
_diffrn_reflns_theta_max                25
_diffrn_reflns_theta_full               25
_diffrn_measured_fraction_theta_full
                                        1
_diffrn_measured_fraction_theta_max
                                        1
_diffrn_reflns_Laue_measured_fraction_full
                                        1
_diffrn_reflns_Laue_measured_fraction_max
                                        1
_diffrn_reflns_point_group_measured_fraction_full
                                        1
_diffrn_reflns_point_group_measured_fraction_max
                                        1
_reflns_Friedel_coverage                0
_reflns_number_total                    4127
_reflns_number_gt                       3095
_reflns_threshold_expression            'I > 2\s(I)'
 
#----------------------------------------------------------------------------#
#                   COMPUTER PROGRAMS USED                                   #
#----------------------------------------------------------------------------#
 
_computing_data_collection              'Bruker APEX2'
_computing_cell_refinement              'Bruker SAINT'
_computing_data_reduction               'Bruker SAINT'
_computing_structure_solution           'SHELXS-97 (Sheldrick 2008)'
_computing_structure_refinement         'SHELXL-2014/7 (Sheldrick, 2014)'
_computing_molecular_graphics           'Bruker SHELXTL'
_computing_publication_material         'Bruker SHELXTL'
 
#----------------------------------------------------------------------------#
#                   STRUCTURE SOLUTION                                       #
#----------------------------------------------------------------------------#
 
_atom_sites_solution_hydrogens          geom
 
#----------------------------------------------------------------------------#
#                   REFINEMENT INFORMATION                                   #
#----------------------------------------------------------------------------#
 
_refine_ls_structure_factor_coef        Fsqd
_refine_ls_matrix_type                  full
_refine_ls_weighting_scheme             calc
_refine_ls_weighting_details
              'w=1/[\s^2^(Fo^2^)+(0.0971P)^2^+0.6461P] where P=(Fo^2^+2Fc^2^)/3'
_refine_ls_hydrogen_treatment           constr
_refine_ls_extinction_method            'SHELXL-2014/7 (Sheldrick 2014'
_refine_ls_extinction_expression
                                    Fc^*^=kFc[1+0.001xFc^2^\l^3^/sin(2\q)]^-1/4^
_refine_ls_extinction_coef              0.002(2)
_refine_ls_number_reflns                4127
_refine_ls_number_parameters            321
_refine_ls_number_restraints            0
_refine_ls_number_constraints           0
_refine_ls_R_factor_all                 0.0751
_refine_ls_R_factor_gt                  0.0566
_refine_ls_wR_factor_ref                0.1846
_refine_ls_wR_factor_gt                 0.1669
_refine_ls_goodness_of_fit_ref          1.042
_refine_ls_restrained_S_all             1.042
_refine_ls_shift/su_max                 0
_refine_ls_shift/su_mean                0
_refine_diff_density_max                0.584
_refine_diff_density_min                -0.243
_refine_diff_density_rms                0.047
 
#----------------------------------------------------------------------------#
#                   CONSTRAINTS AND RESTRAINTS                               #
#----------------------------------------------------------------------------#
 
 
#----------------------------------------------------------------------------#
#                   ATOMIC TYPES, COORDINATES AND THERMAL PARAMETERS         #
#----------------------------------------------------------------------------#
 
loop_
    _atom_type_symbol
    _atom_type_description
    _atom_type_scat_dispersion_real
    _atom_type_scat_dispersion_imag
    _atom_type_scat_source
C C 0.0033 0.0016 'International Tables Vol C Tables 4.2.6.8 and 6.1.1.4'
H H 0 0 'International Tables Vol C Tables 4.2.6.8 and 6.1.1.4'
F F 0.0171 0.0103 'International Tables Vol C Tables 4.2.6.8 and 6.1.1.4'
N N 0.0061 0.0033 'International Tables Vol C Tables 4.2.6.8 and 6.1.1.4'
O O 0.0106 0.006 'International Tables Vol C Tables 4.2.6.8 and 6.1.1.4'
 
loop_
    _atom_site_label
    _atom_site_type_symbol
    _atom_site_fract_x
    _atom_site_fract_y
    _atom_site_fract_z
    _atom_site_U_iso_or_equiv
    _atom_site_adp_type
    _atom_site_occupancy
    _atom_site_site_symmetry_order
    _atom_site_calc_flag
    _atom_site_refinement_flags_posn
    _atom_site_refinement_flags_adp
    _atom_site_refinement_flags_occupancy
    _atom_site_disorder_assembly
    _atom_site_disorder_group
C1 C 0.1422(3) 0.8043(3) 0.4900(3) 0.0652(8) Uani 1 1 d . . . . .
H1 H 0.1459 0.895 0.4699 0.078 Uiso 1 1 calc R U . . .
C2 C 0.0325(4) 0.7800(4) 0.5790(3) 0.0779(10) Uani 1 1 d . . . . .
H2 H -0.0373 0.854 0.6179 0.093 Uiso 1 1 calc R U . . .
C3 C 0.0265(4) 0.6462(4) 0.6104(3) 0.0770(10) Uani 1 1 d . . . . .
H3 H -0.048 0.6292 0.6697 0.092 Uiso 1 1 calc R U . . .
C4 C 0.1317(4) 0.5386(4) 0.5530(3) 0.0758(10) Uani 1 1 d . . . . .
H4 H 0.128 0.4479 0.5729 0.091 Uiso 1 1 calc R U . . .
C5 C 0.2447(4) 0.5644(3) 0.4646(2) 0.0617(8) Uani 1 1 d . . . . .
H5 H 0.319 0.4902 0.4295 0.074 Uiso 1 1 calc R U . . .
C6 C 0.2474(3) 0.6960(3) 0.4294(2) 0.0458(6) Uani 1 1 d . . . . .
C7 C 0.3742(3) 0.7238(2) 0.3340(2) 0.0415(6) Uani 1 1 d . . . . .
C8 C 0.4560(3) 0.5972(2) 0.2642(2) 0.0422(6) Uani 1 1 d . . . . .
C9 C 0.4022(3) 0.5281(2) 0.2016(2) 0.0413(6) Uani 1 1 d . . . . .
C10 C 0.2664(3) 0.5469(3) 0.1837(2) 0.0475(6) Uani 1 1 d . . . . .
H10 H 0.1859 0.6185 0.2158 0.057 Uiso 1 1 calc R U . . .
C11 C 0.2552(3) 0.4568(3) 0.1174(2) 0.0548(7) Uani 1 1 d . . . . .
C12 C 0.3753(4) 0.3489(3) 0.0686(3) 0.0649(8) Uani 1 1 d . . . . .
H12 H 0.3648 0.2904 0.0236 0.078 Uiso 1 1 calc R U . . .
C13 C 0.5073(4) 0.3279(3) 0.0856(2) 0.0590(8) Uani 1 1 d . . . . .
H13 H 0.5867 0.2557 0.053 0.071 Uiso 1 1 calc R U . . .
C14 C 0.5206(3) 0.4168(3) 0.1529(2) 0.0466(6) Uani 1 1 d . . . . .
C15 C 0.5983(3) 0.5245(3) 0.2525(2) 0.0498(7) Uani 1 1 d . . . . .
H15 H 0.6592 0.5456 0.2856 0.06 Uiso 1 1 calc R U . . .
C16 C 0.0066(4) 0.5808(4) 0.1300(3) 0.0728(9) Uani 1 1 d . . . . .
H16A H -0.024 0.577 0.2095 0.109 Uiso 1 1 calc R U . . .
H16B H -0.0713 0.5793 0.1022 0.109 Uiso 1 1 calc R U . . .
H16C H 0.0329 0.6648 0.1033 0.109 Uiso 1 1 calc R U . . .
C17 C 0.7815(3) 0.3149(3) 0.1575(3) 0.0739(10) Uani 1 1 d . . . . .
H17A H 0.7745 0.2261 0.1919 0.111 Uiso 1 1 calc R U . . .
H17B H 0.8478 0.3434 0.1833 0.111 Uiso 1 1 calc R U . . .
H17C H 0.8163 0.3082 0.0786 0.111 Uiso 1 1 calc R U . . .
C18 C 0.3133(3) 0.8470(3) 0.2579(2) 0.0493(7) Uani 1 1 d . . . . .
C19 C 0.4759(3) 0.7644(2) 0.3835(2) 0.0417(6) Uani 1 1 d . . . . .
C20 C 0.5986(3) 0.8166(2) 0.3288(2) 0.0435(6) Uani 1 1 d . . . . .
C21 C 0.6682(3) 0.8482(3) 0.2191(2) 0.0522(7) Uani 1 1 d . . . . .
H21 H 0.6383 0.8319 0.1609 0.063 Uiso 1 1 calc R U . . .
C22 C 0.7823(3) 0.9040(3) 0.1989(3) 0.0610(8) Uani 1 1 d . . . . .
C23 C 0.8318(3) 0.9251(3) 0.2842(3) 0.0665(9) Uani 1 1 d . . . . .
H23 H 0.9099 0.9614 0.2678 0.08 Uiso 1 1 calc R U . . .
C24 C 0.7676(3) 0.8934(3) 0.3918(3) 0.0606(8) Uani 1 1 d . . . . .
H24 H 0.8011 0.9076 0.4487 0.073 Uiso 1 1 calc R U . . .
C25 C 0.6506(3) 0.8394(3) 0.4144(2) 0.0468(6) Uani 1 1 d . . . . .
C26 C 0.4631(3) 0.7584(3) 0.4943(2) 0.0472(6) Uani 1 1 d . . . . .
H26 H 0.3923 0.7283 0.5491 0.057 Uiso 1 1 calc R U . . .
C27 C 0.5828(4) 0.8135(3) 0.6223(3) 0.0650(8) Uani 1 1 d . . . . .
H27A H 0.5053 0.7892 0.6789 0.098 Uiso 1 1 calc R U . . .
H27B H 0.5793 0.9071 0.6302 0.098 Uiso 1 1 calc R U . . .
H27C H 0.6743 0.7516 0.6294 0.098 Uiso 1 1 calc R U . . .
C28 C 0.8159(5) 0.9262(5) 0.0018(3) 0.1022(14) Uani 1 1 d . . . . .
H28A H 0.8326 0.8295 -0.0069 0.153 Uiso 1 1 calc R U . . .
H28B H 0.8713 0.965 -0.0636 0.153 Uiso 1 1 calc R U . . .
H28C H 0.7145 0.974 0.0128 0.153 Uiso 1 1 calc R U . . .
F1 F 0.19054(19) 0.84337(18) 0.23988(17) 0.0731(6) Uani 1 1 d . . . . .
F2 F 0.4044(2) 0.85101(19) 0.15578(14) 0.0697(5) Uani 1 1 d . . . . .
F3 F 0.2830(2) 0.97155(16) 0.29649(16) 0.0684(5) Uani 1 1 d . . . . .
N1 N 0.6390(2) 0.4165(2) 0.1859(2) 0.0527(6) Uani 1 1 d . . . . .
N2 N 0.5672(3) 0.8020(2) 0.51405(19) 0.0503(6) Uani 1 1 d . . . . .
O1 O 0.1279(3) 0.4652(2) 0.0931(2) 0.0741(7) Uani 1 1 d . . . . .
O2 O 0.8589(3) 0.9410(3) 0.0941(2) 0.0888(8) Uani 1 1 d . . . . .
 
loop_
    _atom_site_aniso_label
    _atom_site_aniso_U_11
    _atom_site_aniso_U_22
    _atom_site_aniso_U_33
    _atom_site_aniso_U_23
    _atom_site_aniso_U_13
    _atom_site_aniso_U_12
C1 0.0487(17) 0.0591(18) 0.078(2) -0.0191(15) -0.0006(15) -0.0111(13)
C2 0.0540(19) 0.079(2) 0.079(2) -0.0134(19) -0.0080(17) 0.0047(16)
C3 0.058(2) 0.094(3) 0.071(2) 0.0064(19) -0.0113(17) -0.0204(18)
C4 0.092(3) 0.067(2) 0.069(2) 0.0012(17) -0.0177(19) -0.0309(19)
C5 0.073(2) 0.0494(17) 0.0556(17) -0.0112(13) -0.0015(15) -0.0195(14)
C6 0.0389(14) 0.0495(15) 0.0531(15) -0.0133(12) -0.0164(12) -0.0103(11)
C7 0.0375(13) 0.0385(13) 0.0516(14) -0.0129(11) -0.0145(11) -0.0085(10)
C8 0.0415(14) 0.0372(13) 0.0480(14) -0.0097(11) -0.0116(11) -0.0089(10)
C9 0.0472(14) 0.0375(13) 0.0395(13) -0.0064(10) -0.0106(11) -0.0121(10)
C10 0.0510(15) 0.0473(15) 0.0466(14) -0.0098(11) -0.0135(12) -0.0142(12)
C11 0.0659(18) 0.0579(17) 0.0503(16) -0.0087(13) -0.0220(14) -0.0229(14)
C12 0.082(2) 0.0611(19) 0.0593(18) -0.0240(15) -0.0207(16) -0.0207(16)
C13 0.070(2) 0.0474(16) 0.0536(16) -0.0190(13) -0.0070(14) -0.0114(14)
C14 0.0532(16) 0.0402(14) 0.0422(14) -0.0073(11) -0.0068(12) -0.0116(11)
C15 0.0449(15) 0.0420(14) 0.0638(17) -0.0123(12) -0.0165(13) -0.0086(11)
C16 0.067(2) 0.087(2) 0.076(2) -0.0098(18) -0.0322(18) -0.0235(18)
C17 0.0547(19) 0.0568(19) 0.094(2) -0.0210(17) -0.0085(17) 0.0027(14)
C18 0.0425(14) 0.0417(14) 0.0695(18) -0.0108(12) -0.0241(13) -0.0085(11)
C19 0.0399(13) 0.0364(13) 0.0523(15) -0.0108(11) -0.0183(11) -0.0066(10)
C20 0.0408(13) 0.0358(13) 0.0578(16) -0.0080(11) -0.0204(12) -0.0074(10)
C21 0.0497(16) 0.0545(17) 0.0553(16) -0.0051(13) -0.0190(13) -0.0136(13)
C22 0.0538(17) 0.0582(18) 0.069(2) 0.0023(14) -0.0118(15) -0.0203(14)
C23 0.0539(18) 0.066(2) 0.088(2) 0.0029(17) -0.0246(17) -0.0274(15)
C24 0.0586(18) 0.0545(17) 0.085(2) -0.0034(15) -0.0389(17) -0.0196(14)
C25 0.0473(15) 0.0372(13) 0.0624(17) -0.0048(12) -0.0263(13) -0.0095(11)
C26 0.0456(15) 0.0422(14) 0.0564(16) -0.0083(11) -0.0155(12) -0.0122(11)
C27 0.085(2) 0.0612(19) 0.0620(19) -0.0068(14) -0.0385(17) -0.0193(16)
C28 0.102(3) 0.123(4) 0.077(3) 0.026(2) -0.022(2) -0.041(3)
F1 0.0636(11) 0.0626(11) 0.1078(15) 0.0010(10) -0.0497(11) -0.0159(9)
F2 0.0721(12) 0.0727(12) 0.0587(11) 0.0020(8) -0.0226(9) -0.0112(9)
F3 0.0779(12) 0.0423(9) 0.0895(13) -0.0105(8) -0.0364(10) -0.0076(8)
N1 0.0442(13) 0.0427(13) 0.0629(14) -0.0141(10) -0.0079(11) -0.0029(10)
N2 0.0576(14) 0.0478(13) 0.0553(14) -0.0064(10) -0.0273(11) -0.0158(10)
O1 0.0763(15) 0.0791(16) 0.0860(16) -0.0259(12) -0.0393(13) -0.0233(12)
O2 0.0861(18) 0.105(2) 0.0781(17) 0.0090(14) -0.0131(14) -0.0464(15)
 
 
#----------------------------------------------------------------------------#
#                   MOLECULAR GEOMETRY                                       #
#----------------------------------------------------------------------------#
 
_geom_special_details
;
 All esds (except the esd in the dihedral angle between two l.s. planes)
 are estimated using the full covariance matrix.  The cell esds are taken
 into account individually in the estimation of esds in distances, angles
 and torsion angles; correlations between esds in cell parameters are only
 used when they are defined by crystal symmetry.  An approximate (isotropic)
 treatment of cell esds is used for estimating esds involving l.s. planes.
;
loop_
    _geom_bond_atom_site_label_1
    _geom_bond_atom_site_label_2
    _geom_bond_distance
    _geom_bond_site_symmetry_2
    _geom_bond_publ_flag
C1 C2 1.378(5) . ?
C1 C6 1.392(4) . ?
C1 H1 0.93 . ?
C2 C3 1.377(5) . ?
C2 H2 0.93 . ?
C3 C4 1.370(5) . ?
C3 H3 0.93 . ?
C4 C5 1.400(5) . ?
C4 H4 0.93 . ?
C5 C6 1.355(4) . ?
C5 H5 0.93 . ?
C6 C7 1.542(4) . ?
C7 C8 1.526(3) . ?
C7 C19 1.533(3) . ?
C7 C18 1.551(4) . ?
C8 C15 1.364(4) . ?
C8 C9 1.443(3) . ?
C9 C10 1.406(4) . ?
C9 C14 1.409(3) . ?
C10 C11 1.378(4) . ?
C10 H10 0.93 . ?
C11 O1 1.384(3) . ?
C11 C12 1.397(4) . ?
C12 C13 1.358(4) . ?
C12 H12 0.93 . ?
C13 C14 1.389(4) . ?
C13 H13 0.93 . ?
C14 N1 1.379(3) . ?
C15 N1 1.362(3) . ?
C15 H15 0.93 . ?
C16 O1 1.413(4) . ?
C16 H16A 0.96 . ?
C16 H16B 0.96 . ?
C16 H16C 0.96 . ?
C17 N1 1.455(4) . ?
C17 H17A 0.96 . ?
C17 H17B 0.96 . ?
C17 H17C 0.96 . ?
C18 F3 1.332(3) . ?
C18 F1 1.338(3) . ?
C18 F2 1.347(3) . ?
C19 C26 1.365(4) . ?
C19 C20 1.446(4) . ?
C20 C21 1.399(4) . ?
C20 C25 1.416(4) . ?
C21 C22 1.381(4) . ?
C21 H21 0.93 . ?
C22 O2 1.388(4) . ?
C22 C23 1.389(5) . ?
C23 C24 1.363(5) . ?
C23 H23 0.93 . ?
C24 C25 1.393(4) . ?
C24 H24 0.93 . ?
C25 N2 1.369(4) . ?
C26 N2 1.360(3) . ?
C26 H26 0.93 . ?
C27 N2 1.453(3) . ?
C27 H27A 0.96 . ?
C27 H27B 0.96 . ?
C27 H27C 0.96 . ?
C28 O2 1.407(5) . ?
C28 H28A 0.96 . ?
C28 H28B 0.96 . ?
C28 H28C 0.96 . ?
 
loop_
    _geom_angle_atom_site_label_1
    _geom_angle_atom_site_label_2
    _geom_angle_atom_site_label_3
    _geom_angle
    _geom_angle_site_symmetry_1
    _geom_angle_site_symmetry_3
    _geom_angle_publ_flag
C2 C1 C6 121.3(3) . . ?
C2 C1 H1 119.3 . . ?
C6 C1 H1 119.3 . . ?
C3 C2 C1 120.0(3) . . ?
C3 C2 H2 120 . . ?
C1 C2 H2 120 . . ?
C4 C3 C2 119.1(3) . . ?
C4 C3 H3 120.5 . . ?
C2 C3 H3 120.5 . . ?
C3 C4 C5 120.3(3) . . ?
C3 C4 H4 119.8 . . ?
C5 C4 H4 119.8 . . ?
C6 C5 C4 121.0(3) . . ?
C6 C5 H5 119.5 . . ?
C4 C5 H5 119.5 . . ?
C5 C6 C1 118.1(3) . . ?
C5 C6 C7 120.7(2) . . ?
C1 C6 C7 120.8(2) . . ?
C8 C7 C19 110.90(19) . . ?
C8 C7 C6 111.4(2) . . ?
C19 C7 C6 108.5(2) . . ?
C8 C7 C18 108.3(2) . . ?
C19 C7 C18 108.5(2) . . ?
C6 C7 C18 109.2(2) . . ?
C15 C8 C9 106.5(2) . . ?
C15 C8 C7 124.8(2) . . ?
C9 C8 C7 128.7(2) . . ?
C10 C9 C14 118.9(2) . . ?
C10 C9 C8 134.9(2) . . ?
C14 C9 C8 106.2(2) . . ?
C11 C10 C9 118.5(3) . . ?
C11 C10 H10 120.7 . . ?
C9 C10 H10 120.7 . . ?
C10 C11 O1 123.9(3) . . ?
C10 C11 C12 121.2(3) . . ?
O1 C11 C12 114.9(2) . . ?
C13 C12 C11 121.3(3) . . ?
C13 C12 H12 119.3 . . ?
C11 C12 H12 119.3 . . ?
C12 C13 C14 118.3(3) . . ?
C12 C13 H13 120.8 . . ?
C14 C13 H13 120.8 . . ?
N1 C14 C13 130.2(2) . . ?
N1 C14 C9 108.1(2) . . ?
C13 C14 C9 121.7(3) . . ?
N1 C15 C8 110.7(2) . . ?
N1 C15 H15 124.6 . . ?
C8 C15 H15 124.6 . . ?
O1 C16 H16A 109.5 . . ?
O1 C16 H16B 109.5 . . ?
H16A C16 H16B 109.5 . . ?
O1 C16 H16C 109.5 . . ?
H16A C16 H16C 109.5 . . ?
H16B C16 H16C 109.5 . . ?
N1 C17 H17A 109.5 . . ?
N1 C17 H17B 109.5 . . ?
H17A C17 H17B 109.5 . . ?
N1 C17 H17C 109.5 . . ?
H17A C17 H17C 109.5 . . ?
H17B C17 H17C 109.5 . . ?
F3 C18 F1 105.6(2) . . ?
F3 C18 F2 105.2(2) . . ?
F1 C18 F2 104.2(2) . . ?
F3 C18 C7 114.2(2) . . ?
F1 C18 C7 113.3(2) . . ?
F2 C18 C7 113.4(2) . . ?
C26 C19 C20 106.2(2) . . ?
C26 C19 C7 124.2(2) . . ?
C20 C19 C7 129.7(2) . . ?
C21 C20 C25 118.6(2) . . ?
C21 C20 C19 135.7(2) . . ?
C25 C20 C19 105.7(2) . . ?
C22 C21 C20 118.8(3) . . ?
C22 C21 H21 120.6 . . ?
C20 C21 H21 120.6 . . ?
C21 C22 O2 124.2(3) . . ?
C21 C22 C23 121.6(3) . . ?
O2 C22 C23 114.2(3) . . ?
C24 C23 C22 121.0(3) . . ?
C24 C23 H23 119.5 . . ?
C22 C23 H23 119.5 . . ?
C23 C24 C25 118.5(3) . . ?
C23 C24 H24 120.8 . . ?
C25 C24 H24 120.8 . . ?
N2 C25 C24 129.7(3) . . ?
N2 C25 C20 108.8(2) . . ?
C24 C25 C20 121.5(3) . . ?
N2 C26 C19 111.2(2) . . ?
N2 C26 H26 124.4 . . ?
C19 C26 H26 124.4 . . ?
N2 C27 H27A 109.5 . . ?
N2 C27 H27B 109.5 . . ?
H27A C27 H27B 109.5 . . ?
N2 C27 H27C 109.5 . . ?
H27A C27 H27C 109.5 . . ?
H27B C27 H27C 109.5 . . ?
O2 C28 H28A 109.5 . . ?
O2 C28 H28B 109.5 . . ?
H28A C28 H28B 109.5 . . ?
O2 C28 H28C 109.5 . . ?
H28A C28 H28C 109.5 . . ?
H28B C28 H28C 109.5 . . ?
C15 N1 C14 108.4(2) . . ?
C15 N1 C17 125.9(3) . . ?
C14 N1 C17 125.7(2) . . ?
C26 N2 C25 108.1(2) . . ?
C26 N2 C27 126.0(3) . . ?
C25 N2 C27 125.8(2) . . ?
C11 O1 C16 117.5(2) . . ?
C22 O2 C28 118.8(3) . . ?
 
loop_
    _geom_torsion_atom_site_label_1
    _geom_torsion_atom_site_label_2
    _geom_torsion_atom_site_label_3
    _geom_torsion_atom_site_label_4
    _geom_torsion
    _geom_torsion_site_symmetry_1
    _geom_torsion_site_symmetry_2
    _geom_torsion_site_symmetry_3
    _geom_torsion_site_symmetry_4
    _geom_torsion_publ_flag
C6 C1 C2 C3 0.7(5) . . . . ?
C1 C2 C3 C4 0.9(6) . . . . ?
C2 C3 C4 C5 0.8(6) . . . . ?
C3 C4 C5 C6 -4.3(5) . . . . ?
C4 C5 C6 C1 5.8(5) . . . . ?
C4 C5 C6 C7 178.4(3) . . . . ?
C2 C1 C6 C5 -4.0(5) . . . . ?
C2 C1 C6 C7 -176.6(3) . . . . ?
C5 C6 C7 C8 20.0(3) . . . . ?
C1 C6 C7 C8 -167.6(3) . . . . ?
C5 C6 C7 C19 -102.3(3) . . . . ?
C1 C6 C7 C19 70.1(3) . . . . ?
C5 C6 C7 C18 139.6(3) . . . . ?
C1 C6 C7 C18 -48.0(3) . . . . ?
C19 C7 C8 C15 3.7(4) . . . . ?
C6 C7 C8 C15 -117.3(3) . . . . ?
C18 C7 C8 C15 122.6(3) . . . . ?
C19 C7 C8 C9 -178.4(2) . . . . ?
C6 C7 C8 C9 60.6(3) . . . . ?
C18 C7 C8 C9 -59.4(3) . . . . ?
C15 C8 C9 C10 177.0(3) . . . . ?
C7 C8 C9 C10 -1.2(5) . . . . ?
C15 C8 C9 C14 -1.4(3) . . . . ?
C7 C8 C9 C14 -179.6(2) . . . . ?
C14 C9 C10 C11 -1.1(4) . . . . ?
C8 C9 C10 C11 -179.3(3) . . . . ?
C9 C10 C11 O1 -179.6(3) . . . . ?
C9 C10 C11 C12 -0.1(4) . . . . ?
C10 C11 C12 C13 0.8(5) . . . . ?
O1 C11 C12 C13 -179.7(3) . . . . ?
C11 C12 C13 C14 -0.2(5) . . . . ?
C12 C13 C14 N1 178.0(3) . . . . ?
C12 C13 C14 C9 -1.0(4) . . . . ?
C10 C9 C14 N1 -177.5(2) . . . . ?
C8 C9 C14 N1 1.2(3) . . . . ?
C10 C9 C14 C13 1.7(4) . . . . ?
C8 C9 C14 C13 -179.6(3) . . . . ?
C9 C8 C15 N1 1.1(3) . . . . ?
C7 C8 C15 N1 179.4(2) . . . . ?
C8 C7 C18 F3 -158.7(2) . . . . ?
C19 C7 C18 F3 -38.2(3) . . . . ?
C6 C7 C18 F3 79.9(3) . . . . ?
C8 C7 C18 F1 80.4(3) . . . . ?
C19 C7 C18 F1 -159.1(2) . . . . ?
C6 C7 C18 F1 -41.0(3) . . . . ?
C8 C7 C18 F2 -38.2(3) . . . . ?
C19 C7 C18 F2 82.3(2) . . . . ?
C6 C7 C18 F2 -159.6(2) . . . . ?
C8 C7 C19 C26 -115.0(3) . . . . ?
C6 C7 C19 C26 7.6(3) . . . . ?
C18 C7 C19 C26 126.1(3) . . . . ?
C8 C7 C19 C20 66.0(3) . . . . ?
C6 C7 C19 C20 -171.4(2) . . . . ?
C18 C7 C19 C20 -52.9(3) . . . . ?
C26 C19 C20 C21 -179.3(3) . . . . ?
C7 C19 C20 C21 -0.1(5) . . . . ?
C26 C19 C20 C25 -0.4(3) . . . . ?
C7 C19 C20 C25 178.8(2) . . . . ?
C25 C20 C21 C22 -1.8(4) . . . . ?
C19 C20 C21 C22 177.0(3) . . . . ?
C20 C21 C22 O2 -179.3(3) . . . . ?
C20 C21 C22 C23 2.1(4) . . . . ?
C21 C22 C23 C24 -1.1(5) . . . . ?
O2 C22 C23 C24 -179.9(3) . . . . ?
C22 C23 C24 C25 -0.1(5) . . . . ?
C23 C24 C25 N2 -178.7(3) . . . . ?
C23 C24 C25 C20 0.3(4) . . . . ?
C21 C20 C25 N2 179.9(2) . . . . ?
C19 C20 C25 N2 0.8(3) . . . . ?
C21 C20 C25 C24 0.7(4) . . . . ?
C19 C20 C25 C24 -178.4(2) . . . . ?
C20 C19 C26 N2 -0.1(3) . . . . ?
C7 C19 C26 N2 -179.4(2) . . . . ?
C8 C15 N1 C14 -0.4(3) . . . . ?
C8 C15 N1 C17 -178.3(3) . . . . ?
C13 C14 N1 C15 -179.6(3) . . . . ?
C9 C14 N1 C15 -0.5(3) . . . . ?
C13 C14 N1 C17 -1.8(5) . . . . ?
C9 C14 N1 C17 177.4(3) . . . . ?
C19 C26 N2 C25 0.6(3) . . . . ?
C19 C26 N2 C27 177.8(2) . . . . ?
C24 C25 N2 C26 178.2(3) . . . . ?
C20 C25 N2 C26 -0.9(3) . . . . ?
C24 C25 N2 C27 1.0(4) . . . . ?
C20 C25 N2 C27 -178.1(2) . . . . ?
C10 C11 O1 C16 6.3(4) . . . . ?
C12 C11 O1 C16 -173.2(3) . . . . ?
C21 C22 O2 C28 2.4(5) . . . . ?
C23 C22 O2 C28 -178.8(3) . . . . ?
 
_iucr_refine_instructions_details
;
TITL 5BROMO in P-1
CELL 0.71073  10.09400  10.16790  12.68130  81.8483  72.4104  71.5178
ZERR 2 0.00030 0.00030 0.00030 0.0013 0.0012 0.0011
LATT 1
SFAC C  H  F  N  O
UNIT 56  50  6  4  4
OMIT -3 50
L.S. 8
EXTI 0.001814
ACTA
BOND $H
FMAP 2
PLAN 5
CONF
SIZE 0.250 0.250 0.300
WGHT   0.097100   0.000000
FVAR 0.201940
TEMP 23.000
MOLE 1
C1     1   0.142165   0.804320   0.489973  11.000000   0.048730 =
           0.059120   0.077600  -0.019150  -0.000640  -0.011070
AFIX 43
H1     2   0.145861   0.894955   0.469939  11.000000  -1.200000
AFIX 0
C2     1   0.032547   0.780023   0.578997  11.000000   0.053990 =
           0.078750   0.079130  -0.013390  -0.007960   0.004720
AFIX 43
H2     2  -0.037346   0.853969   0.617896  11.000000  -1.200000
AFIX 0
C3     1   0.026487   0.646237   0.610371  11.000000   0.057800 =
           0.093650   0.070630   0.006430  -0.011290  -0.020410
AFIX 43
H3     2  -0.047997   0.629210   0.669692  11.000000  -1.200000
AFIX 0
C4     1   0.131664   0.538606   0.553007  11.000000   0.091980 =
           0.067270   0.069410   0.001160  -0.017700  -0.030940
AFIX 43
H4     2   0.127971   0.447943   0.572864  11.000000  -1.200000
AFIX 0
C5     1   0.244724   0.564410   0.464610  11.000000   0.072800 =
           0.049400   0.055570  -0.011240  -0.001520  -0.019490
AFIX 43
H5     2   0.319023   0.490163   0.429532  11.000000  -1.200000
AFIX 0
C6     1   0.247440   0.695978   0.429446  11.000000   0.038920 =
           0.049490   0.053100  -0.013260  -0.016360  -0.010310
C7     1   0.374223   0.723778   0.334031  11.000000   0.037490 =
           0.038480   0.051560  -0.012880  -0.014520  -0.008460
C8     1   0.456032   0.597238   0.264235  11.000000   0.041490 =
           0.037160   0.048030  -0.009680  -0.011640  -0.008920
C9     1   0.402184   0.528138   0.201610  11.000000   0.047210 =
           0.037470   0.039500  -0.006360  -0.010650  -0.012110
C10    1   0.266370   0.546887   0.183688  11.000000   0.051030 =
           0.047250   0.046600  -0.009810  -0.013510  -0.014150
AFIX 43
H10    2   0.185912   0.618482   0.215832  11.000000  -1.200000
AFIX 0
C11    1   0.255164   0.456786   0.117421  11.000000   0.065940 =
           0.057890   0.050270  -0.008700  -0.022010  -0.022910
C12    1   0.375330   0.348948   0.068612  11.000000   0.081670 =
           0.061150   0.059310  -0.023970  -0.020700  -0.020730
AFIX 43
H12    2   0.364781   0.290427   0.023574  11.000000  -1.200000
AFIX 0
C13    1   0.507253   0.327861   0.085615  11.000000   0.070110 =
           0.047440   0.053610  -0.019020  -0.006960  -0.011370
AFIX 43
H13    2   0.586658   0.255660   0.053034  11.000000  -1.200000
AFIX 0
C14    1   0.520611   0.416844   0.152895  11.000000   0.053160 =
           0.040240   0.042250  -0.007300  -0.006790  -0.011600
C15    1   0.598319   0.524454   0.252524  11.000000   0.044910 =
           0.041980   0.063780  -0.012340  -0.016510  -0.008600
AFIX 43
H15    2   0.659222   0.545634   0.285553  11.000000  -1.200000
AFIX 0
C16    1   0.006640   0.580830   0.129957  11.000000   0.066950 =
           0.087000   0.075780  -0.009780  -0.032170  -0.023550
AFIX 137
H16A   2  -0.024001   0.576984   0.209456  11.000000  -1.500000
H16B   2  -0.071348   0.579251   0.102157  11.000000  -1.500000
H16C   2   0.032895   0.664830   0.103273  11.000000  -1.500000
AFIX 0
C17    1   0.781520   0.314917   0.157510  11.000000   0.054720 =
           0.056750   0.093510  -0.020950  -0.008470   0.002670
AFIX 137
H17A   2   0.774505   0.226063   0.191898  11.000000  -1.500000
H17B   2   0.847835   0.343394   0.183347  11.000000  -1.500000
H17C   2   0.816256   0.308235   0.078575  11.000000  -1.500000
AFIX 0
C18    1   0.313268   0.847007   0.257948  11.000000   0.042530 =
           0.041720   0.069550  -0.010840  -0.024130  -0.008490
C19    1   0.475868   0.764388   0.383538  11.000000   0.039850 =
           0.036380   0.052340  -0.010760  -0.018300  -0.006630
C20    1   0.598581   0.816614   0.328752  11.000000   0.040780 =
           0.035840   0.057840  -0.007970  -0.020440  -0.007440
C21    1   0.668248   0.848184   0.219099  11.000000   0.049730 =
           0.054540   0.055300  -0.005150  -0.018970  -0.013630
AFIX 43
H21    2   0.638307   0.831905   0.160887  11.000000  -1.200000
AFIX 0
C22    1   0.782278   0.903958   0.198870  11.000000   0.053840 =
           0.058240   0.068580   0.002300  -0.011800  -0.020290
C23    1   0.831776   0.925088   0.284245  11.000000   0.053890 =
           0.066000   0.088430   0.002920  -0.024580  -0.027360
AFIX 43
H23    2   0.909900   0.961393   0.267774  11.000000  -1.200000
AFIX 0
C24    1   0.767588   0.893422   0.391788  11.000000   0.058560 =
           0.054470   0.084500  -0.003390  -0.038920  -0.019590
AFIX 43
H24    2   0.801105   0.907580   0.448743  11.000000  -1.200000
AFIX 0
C25    1   0.650624   0.839362   0.414447  11.000000   0.047300 =
           0.037180   0.062380  -0.004850  -0.026290  -0.009540
C26    1   0.463061   0.758368   0.494291  11.000000   0.045570 =
           0.042220   0.056430  -0.008340  -0.015520  -0.012190
AFIX 43
H26    2   0.392301   0.728334   0.549131  11.000000  -1.200000
AFIX 0
C27    1   0.582839   0.813460   0.622334  11.000000   0.084500 =
           0.061160   0.062050  -0.006800  -0.038500  -0.019340
AFIX 137
H27A   2   0.505287   0.789177   0.678931  11.000000  -1.500000
H27B   2   0.579276   0.907150   0.630164  11.000000  -1.500000
H27C   2   0.674284   0.751631   0.629431  11.000000  -1.500000
AFIX 0
C28    1   0.815892   0.926213   0.001772  11.000000   0.101950 =
           0.122510   0.076690   0.025930  -0.021680  -0.041300
AFIX 137
H28A   2   0.832636   0.829497  -0.006863  11.000000  -1.500000
H28B   2   0.871264   0.965003  -0.063560  11.000000  -1.500000
H28C   2   0.714453   0.974035   0.012753  11.000000  -1.500000
AFIX 0
F1     3   0.190539   0.843373   0.239884  11.000000   0.063590 =
           0.062590   0.107820   0.000960  -0.049720  -0.015900
F2     3   0.404358   0.851007   0.155782  11.000000   0.072060 =
           0.072730   0.058720   0.002010  -0.022630  -0.011220
F3     3   0.282980   0.971545   0.296486  11.000000   0.077920 =
           0.042300   0.089470  -0.010500  -0.036370  -0.007620
N1     4   0.639008   0.416548   0.185866  11.000000   0.044190 =
           0.042730   0.062940  -0.014070  -0.007930  -0.002870
N2     4   0.567198   0.801989   0.514052  11.000000   0.057640 =
           0.047790   0.055260  -0.006420  -0.027300  -0.015790
O1     5   0.127899   0.465161   0.093133  11.000000   0.076280 =
           0.079080   0.086030  -0.025880  -0.039270  -0.023300
O2     5   0.858871   0.941022   0.094095  11.000000   0.086100 =
           0.105100   0.078100   0.009040  -0.013120  -0.046410
HKLF 4
END
HKLF 4
REM  5BROMO in P-1
REM R1=  0.0566 for    3095 Fo > 4sig(Fo)  and  0.0751 for all    4127 data
REM    321 parameters refined using      0 restraints
;
 
# END of CIF
